# Supplementary material for: Polyploidy breaks speciation barriers in Australian burrowing frogs Neobatrachus
Source: PLoS Genet. 2020 May 11;16(5):e1008769. doi: 10.1371/journal.pgen.1008769 (PMC7259803; doi:10.1371/journal.pgen.1008769)
Supplement: S2 Table — (XLSX) [file pgen.1008769.s003.xlsx]

## Sheet: Sheet1
Species	Ploidy	Number of samples	Pi median, %	CI_pi_median, %	Tajima's D median	Confidence interval Tajima's D median	Number of valid loci	Average number of valid sites in loci
N. albipes	2	8	0.161	[0.1398, 0.184]	-0.853	[-0.9717, -0.7762]	415	1422
N. aquilonius	4	11	0.661	[0.5021, 0.9544]	-1.309	[-1.416, -1.207]	233	643
N. fulvus	2	8	0.127	[0.09706, 0.165]	-0.955	[-1.055, -0.7119]	224	1192
N. kunapalari	4	8	1.638	[1.379, 2.102]	-0.509	[-0.57, -0.4297]	249	741
N. pelobatoides	2	7	0.226	[0.2022, 0.2594]	-0.956	[-1.075, -0.8798]	331	1000
N. pictus	2	5	0.296	[0.2655, 0.3195]	-0.11	[-0.1885, -0.02694]	408	1450
N. sudellae	4	14	1.248	[0.9262, 1.947]	-1.404	[-1.474, -1.347]	215	575
N. sutor	2	9	0.288	[0.2658, 0.3358]	-0.533	[-0.6178, -0.3964]	222	1016
N. wilsmorei	2	5	0.114	[0.1059, 0.1294]	-0.508	[-0.626, -0.3559]	421	1388
